# Supplementary material
Source: MDPI journal article supplement (https://www.mdpi.com/2079-6439/8/2/9)
Supplement: s1 [file s1]

## Supplementary Materials

*Article*

# Mineralogical and geochemical characterization of asbestiform todorokite, birnessite and ranciéite and their host Mn-rich deposits from Serra D'Aiello (Southern Italy)

Andrea Bloise <sup>1</sup>, Domenico Miriello <sup>1</sup>, Rosanna De Rosa <sup>1,\*</sup>, Giovanni Vespasiano <sup>1,2,\*</sup>, Ilaria Fuoco <sup>1</sup>, Raffaella De Luca <sup>1</sup>, Eugenio Barrese <sup>1</sup> and Carmine Apollaro <sup>1</sup>

<sup>1</sup> Department of Biology, Ecology and Earth Sciences, University of Calabria, Via Pietro Bucci, 87036 Rende, CS, Italy

<sup>2</sup> E3 (Environment, Earth, Engineering) soc.coop. (University of Calabria), 87036 Rende, CS, Italy

\* Correspondence: derosa@unical.it (R.D.R.); giovanni.vespasiano@unical.it (G.V.); Tel.: +39 0984 493690 (R.D.R.); +39 0984 493580 (G.V.)

Received: 8 December 2019; Accepted: 26 January 2020; Published: 28 January 2020

**This file includes the supporting information of the paper entitled: “Mineralogical and geochemical characterization of asbestiform todorokite, birnessite and ranciéite and their host Mn-rich deposits from Serra D'Aiello (Southern Italy)”.**

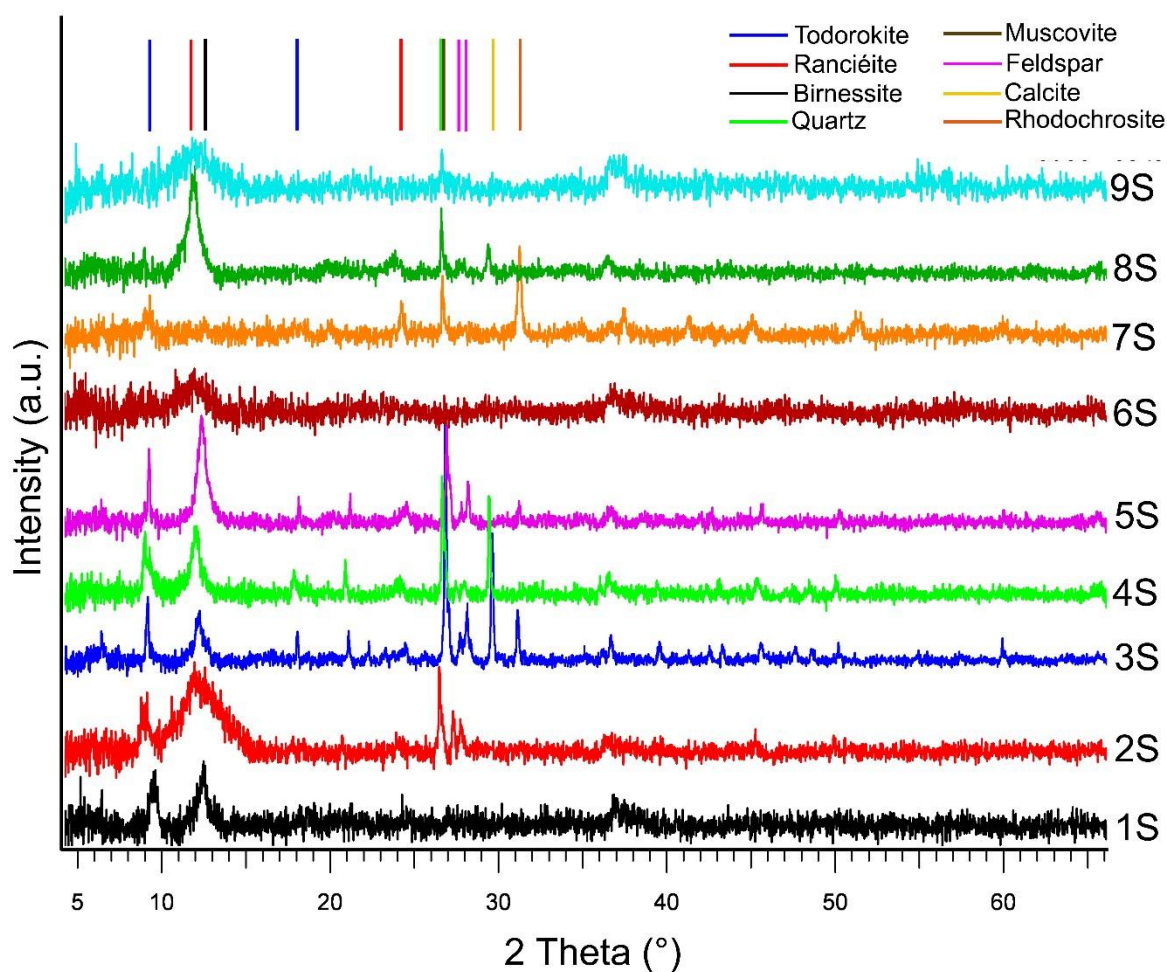

**Figure S1.** XRPD pattern of the samples examined. Peaks were assigned according to literature (International Centre for Diffraction Data (2005). ICDD Products/PDF-2, <http://www.icdd.com/products/pdf2.htm>).

**Table S1.** Threshold values of potential hazardous elements in soils, groundwaters (Italian Legislative Decree N°.152 of 03/04/2006) and air (NIOSH, 2007).

| Elements | SOIL                                   | WATER                                  | AIR                      |
|----------|----------------------------------------|----------------------------------------|--------------------------|
|          | Thresholds Italian Law D.Lgs. 152/2006 | Thresholds Italian Law D.Lgs. 152/2006 | Thresholds NIOSH 2007    |
|          | LIMIT A (mg/kg)                        | (µg/L)                                 | (TWA-mg/m <sup>3</sup> ) |
| Cr       | 150                                    | 50                                     | 0.5                      |
| Cu       | 120                                    | 1000                                   | 1                        |
| Ni       | 120                                    | 20                                     | 0.015                    |
| Pb       | 100                                    | 10                                     | 0.05                     |
| V        | 90                                     | -                                      | -                        |
| Co       | 20                                     | 50                                     | 0.05                     |
| Zn       | 150                                    | 3000                                   | -                        |
